# Supplementary material for: A Comparative Assessment of Epidemiologically Different Cutaneous Leishmaniasis Outbreaks in Madrid, Spain and Tolima, Colombia: An Estimation of the Reproduction Number via a Mathematical Model
Source: PubMed Central journal article supplement (PMC6073504; doi:10.3390/tropicalmed3020043), 2018-04-19
Supplement: tropicalmed-03-00043-s001.pdf [file tropicalmed-03-00043-s001.pdf]

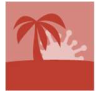

# A Comparative Assessment of Epidemiologically Different Cutaneous Leishmaniasis Outbreaks in Madrid-Spain and Tolima-Colombia: An Estimation of the Reproduction Number via a Mathematical Model

Anuj Mubayi <sup>1,\*</sup>, Marlio Paredes <sup>1,2,3,4</sup> and Juan Ospina <sup>5</sup>

## Supplementary Material

### S.1. Observed curve of accumulated cases

The observed curve of accumulated cases for Madrid outbreak is shown in the following figure

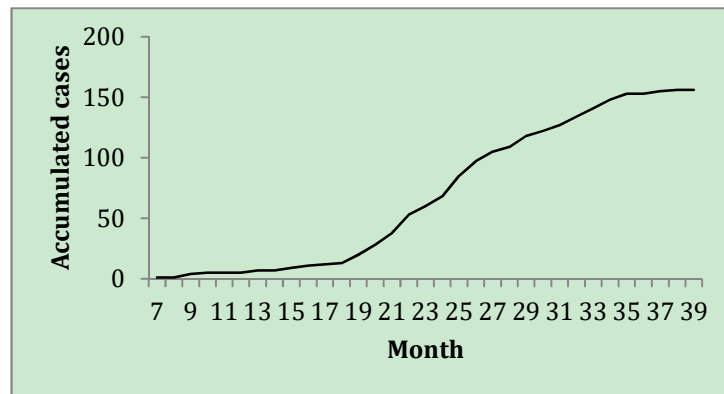

**Figure S1.** Cumulative cases of Leishmaniasis in the Madrid from July 2009 to March 2012 [Error! Reference source not found.].

The observed curve of accumulated cases starts from the month 7 (July 2009) and ends at the month 39 (March 2012). The total number of cases was 266.

The observed curve of accumulated cases for the two Tolima outbreaks is shown in the following figure.

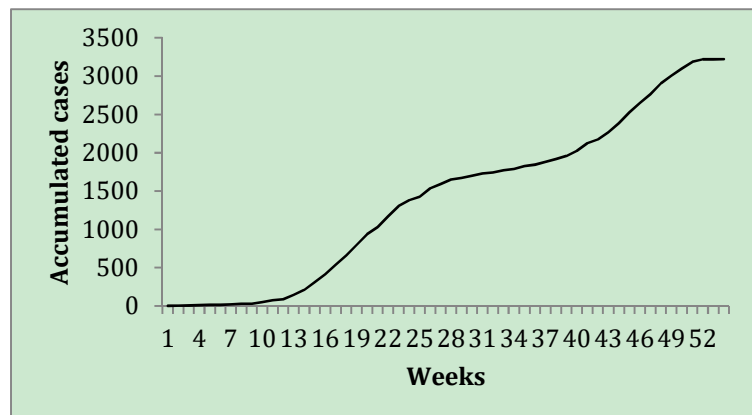

**Figure S2.** Cumulative cases of Leishmaniasis in Tolima-Colombia during 2016 [**Error! Reference source not found.**].

The observed curve of accumulated cases starts from the epidemiological week 1 (first week of January 2016) and ends at the epidemiological week 52 (first week of January 2017). The total number of cases was 3223. We observe clearly that two outbreaks held during 2016 at Tolima, Colombia. The first outbreak occurred since week 1 to week 35 and the second outbreak occurred since week 36 to week 52.

The differences in some of factors that may impact health disparity between Madrid-Spain and Tolima-Colombia are shown in following table.

|                                     | Madrid-Spain<br>(2009-2012)<br>[2008 Statistics] | Tolima-Colombia<br>(2016)<br>[2015 Statistics] |
|-------------------------------------|--------------------------------------------------|------------------------------------------------|
| GDP Per Capita                      | 35,578 USD                                       | 6044 USD                                       |
| Population Size                     | 3.2 M (2017)                                     | 1.41 M (2016)                                  |
| Avg. Annual Temperature             | 15°C (1981-2010)                                 | 24°C                                           |
| Avg. Annual Precipitation           | 421.5mm (1981-2010)                              | 1500 mm                                        |
| Population Density                  | 5265,91 hab./km <sup>2</sup> (2017)              | 59,94 hab/km <sup>2</sup> (2016)               |
| Proportion Below Poverty Line       | 15.6 %                                           | 32.9 %                                         |
| Gini Coefficient                    | 36.0 (2014 World Bank)                           | 51.1 (2015 World Bank)                         |
| Mean Income per Unit of Consumption | Euro 17,800                                      | \$8,304 (per year Colombia)                    |
| Unemployment rate                   | 13.8% (2017)                                     | 13% (2017)                                     |

## S.2. Mathematical Models

### S.2.1. Mathematical Model for Leishmaniasis in Madrid-Spain

We use a model proposed in [**Error! Reference source not found.**] which has the form

$$\frac{dX_h}{dt} = \mu_h N_h - \frac{a_h \beta_{vh} X_h Y_v}{N_h + N_A} - \mu_h X_h \quad (S1)$$

$$\frac{dY_h}{dt} = \frac{a_h \beta_{vh} X_h Y_v}{N_h + N_A} - \gamma_h Y_h - \mu_h Y_h \quad (S2)$$

$$\frac{dZ_h}{dt} = \gamma_h Y_h - \mu_h Z_h \quad (S3)$$

$$\frac{dX_v}{dt} = \Lambda - \frac{b_v \beta_{hv} X_v Y_h}{N_h + N_A} - \frac{b_v \beta_{Av} X_v Y_A}{N_h + N_A} - \mu_v X_v \quad (S4)$$

$$\frac{dY_v}{dt} = \frac{b_v \beta_{hv} X_v Y_h}{N_h + N_A} + \frac{b_v \beta_{Av} X_v Y_A}{N_h + N_A} - \mu_v Y_v \quad (S5)$$

$$\frac{dX_A}{dt} = \mu_A N_A - \frac{\alpha_A \beta_{vA} X_A Y_v}{N_h + N_A} - \mu_A X_A \quad (S6)$$

$$\frac{dY_A}{dt} = \frac{\alpha_A \beta_{vA} X_A Y_v}{N_h + N_A} - \mu_A Y_A \quad (S7)$$

The equations (S1), (S2) and (S3) are for human individuals, the equations (S4) and (S5) are for vectors; and equations (S6) and (S7) are for the animal reservoir. The parameters in the equations are the usual in an extended SIR model and their detailed meanings can be founded in [**Error! Reference source not found.**]. The basic reproductive number for the model (S1)-(S7) has the form

$$R_0^2 = \frac{\beta_{hv}b_vN_h}{(N_h + N_A)(\mu_h + \gamma)} \frac{\beta_{vh}a_h\Lambda/\mu_v}{(N_h + N_A)\mu_v} + \frac{\beta_{Av}b_vN_A}{(N_h + N_A)\mu_A} \frac{\beta_{vA}\alpha_A\Lambda/\mu_v}{(N_h + N_A)\mu_v} \quad (S8)$$

At a first glance it seems the model (S1)-(S7) is very complex to try to fix the curve of accumulated cases. Then we use a strategy also applied in [Error! Reference source not found.] and inspired in [Error! Reference source not found.].

Now, we transform the complex model (S1)-(S7) into an effective simple SIR model. Through this transformation the equation (S8) will be derived again. Assuming the number of infected reservoir animals are constant during the outbreak and  $X_A(t) = N_A$ , the equation (S7) is reduced to

$$\frac{\alpha_A\beta_{vA}N_A Y_v}{N_h + N_A} - \mu_A Y_A = 0 \quad (S9)$$

and from this equation we obtain

$$Y_A = \frac{\alpha_A\beta_{vA}N_A Y_v}{(N_h + N_A)\mu_A} \quad (S10)$$

On the other hand, assuming that the number of infected vectors are keeping approximately constant during the outbreak and  $X_v(t) = N_v$ ; the equation (S5) is reduced to

$$\frac{b_v\beta_{hv}X_v Y_h}{N_h + N_A} + \frac{b_v\beta_{Av}X_v Y_A}{N_h + N_A} = \mu_v Y_v \quad (S11)$$

From (S10) and (S11) we have

$$Y_v = -\frac{b_v\beta_{hv}N_v Y_h (N_h + N_A)\mu_A}{-\mu_A\mu_v N_h^2 - 2\mu_A\mu_v N_h N_A - \mu_A\mu_v N_A^2 + b_v\beta_{Av}N_v\alpha_A\beta_{vA}N_A} \quad (S12)$$

Then, substituting (S12) in (S1) we obtain

$$\frac{dX_h}{dt} = \mu_h N_h + \frac{a_h\beta_{vh}X_h b_v\beta_{hv}N_v Y_h \mu_A}{-\mu_A\mu_v N_h^2 - 2\mu_A\mu_v N_h N_A - \mu_A\mu_v N_A^2 + b_v\beta_{Av}N_v\alpha_A\beta_{vA}N_A} \quad (S13)$$

and with the approximation  $X_h(t) = N_h$ , the equation (S13) takes the form

$$\frac{dX_h}{dt} = -\frac{a_h\beta_{vh}X_h b_v\beta_{hv}N_v Y_h \mu_A}{\mu_A\mu_v N_h^2 + 2\mu_A\mu_v N_h N_A + \mu_A\mu_v N_A^2 - b_v\beta_{Av}N_v\alpha_A\beta_{vA}N_A} \quad (S14)$$

Now, substituting (S12) in (S2) we obtain

$$\frac{dY_h}{dt} = -\frac{a_h\beta_{vh}X_h b_v\beta_{hv}N_v Y_h \mu_A}{-\mu_A\mu_v N_h^2 - 2\mu_A\mu_v N_h N_A - \mu_A\mu_v N_A^2 + b_v\beta_{Av}N_v\alpha_A\beta_{vA}N_A} - \gamma_h Y_h - \mu_h Y_h \quad (S15)$$

Observing (S14) and (S15) it is possible to define the following effective infectiousness

$$\beta_{eff} = \frac{a_h\beta_{vh}b_v\beta_{hv}N_v\mu_A}{\mu_A\mu_v N_h^2 + 2\mu_A\mu_v N_h N_A + \mu_A\mu_v N_A^2 - b_v\beta_{Av}N_v\alpha_A\beta_{vA}N_A} \quad (S16)$$

Using this, the equations (S14) and (S15) are reduced to

$$\frac{dX_h}{dt} = -\beta_{eff}X_h Y_h \quad (S17)$$

$$\frac{dY_h}{dt} = \beta_{eff}X_h Y_h - \gamma_h Y_h - \mu_h Y_h \quad (S18)$$

Looking at (S18) and (S3) we observe that it is possible to define an effective removal constant given by

$$\gamma_{eff,h} = \gamma_h + \mu_h \quad (S19)$$

Now, using (S19) we can rewrite equations (S18) and Error! Reference source not found. in the following way

$$\frac{dY_h}{dt} = \beta_{eff}X_h Y_h - \gamma_{eff,h}Y_h \quad (S20)$$

$$\frac{dZ_h}{dt} = \gamma_{eff,h} Y_h \tag{S21}$$

Hence, equations (S17), (S20) and (S21) give us an effective simple SIR model for leishmaniasis.

Now, from (S15) we can obtain the condition for the existence of an outbreak

$$-\frac{a_h \beta_{vh} X_h b_v \beta_{hv} N_v Y_h \mu_A}{-\mu_A \mu_v N_h^2 - 2\mu_A \mu_v N_h N_A - \mu_A \mu_v N_A^2 + b_v \beta_{Av} N_v \alpha_A \beta_{vA} N_A} - \gamma_h Y_h - \mu_h Y_h > 0$$

and from here we derive the threshold condition

$$a_h \beta_{vh} X_h b_v \beta_{hv} N_v \mu_A - \gamma_h \mu_A \mu_v N_h^2 - 2\gamma_h \mu_A \mu_v N_h N_A - \gamma_h \mu_A \mu_v N_A^2 + \gamma_h b_v \beta_{Av} N_v \alpha_A \beta_{vA} N_A - \mu_h \mu_A \mu_v N_h^2 - 2\mu_h \mu_A \mu_v N_h N_A - \mu_h \mu_A \mu_v N_A^2 + \mu_h b_v \beta_{Av} N_v \alpha_A \beta_{vA} N_A > 0 \tag{S22}$$

The threshold condition is rewritten as

$$R_0 > 1 \tag{S23}$$

where

$$R_0^2 = \frac{a_h \beta_{vh} N_h b_v \beta_{hv} N_v}{\mu_v (N_h + N_A)^2 (\gamma_h + \mu_h)} + \frac{b_v N_v N_A \beta_{Av} \alpha_A \beta_{vA}}{\mu_A \mu_v (N_h + N_A)^2} \tag{S24}$$

### S.2.2. Mathematical Model for Leishmaniasis in Tolima-Colombia

We use a model proposed in [Error! Reference source not found.] which has the form

$$\frac{dS_v}{dt} = \Lambda_v - \frac{b\beta S_v i_m}{N_c + N_m} - \frac{b\beta S_v i_c}{N_c + N_m} - \mu_v S_v \tag{S25}$$

$$\frac{di_v}{dt} = \frac{b\beta S_v i_m}{N_c + N_m} + \frac{b\beta S_v i_c}{N_c + N_m} - \mu_v i_v \tag{S26}$$

$$\frac{dS_c}{dt} = \Lambda_c - \frac{b\beta S_c i_v}{N_v} - \mu_c S_c \tag{S27}$$

$$\frac{di_c}{dt} = \frac{b\beta S_c i_v}{N_v} - \mu_c i_c - \gamma_c i_c \tag{S28}$$

$$\frac{dR_c}{dt} = -\mu_c R_c + \gamma_c i_c \tag{S29}$$

$$\frac{dS_m}{dt} = (1 - q)\Lambda_m - \frac{b\beta S_m i_v}{N_v} - \mu_m S_m \tag{S30}$$

$$\frac{di_m}{dt} = q\Lambda_m + \frac{b\beta S_m i_v}{N_v} - \mu_m i_m \tag{S31}$$

The equations (S25) and (S26) are for vectors (*Phlebotomus*), the equations (S27), (S28) and (S29) are for civilian individuals; and the equations (S30) and (S31) are for the military individuals. The parameters in the equations are the usual in an extended SIR model and their detailed meaning can be founded in [Error! Reference source not found.]. According to this model the military individuals are penetrating into the deep jungle and then carry on the disease to the urban zones where the civilian people are susceptible to the disease transmitted by the *Phlebotomus*. The basic reproduction number for the model has the form [Error! Reference source not found.]

$$R_0^2 = \frac{b^2 \beta^2 \Lambda_v \Lambda_m}{N_v \mu_v^2 \mu_m (N_c + N_m)} + \frac{b^2 \beta^2 \Lambda_v \Lambda_c}{N_v \mu_v^2 \mu_c (N_c + N_m) (\mu_c + \gamma_c)} \tag{S32}$$

At a first glance it seems the model (S25)-(S31) is very complex in order to fix the curve of accumulated cases. Then we use a strategy also applied in [Error! Reference source not found.] and inspired in [Error! Reference source not found.].

We transform the complex model (S25)-(S31) into an effective simple SIR model. Doing such transformation, the equation (S32) will be derived again. We assume that the number of infected military individuals is constant during the outbreak and  $S_m(t) = N_m$  in equation (S31), also assuming that the number of infected vectors is keeping approximately constant during the outbreak and  $S_v(t) = N_v$  in equation (S26). Then we deduce that

$$i_v = -\frac{N_v b \beta (\mu_m i_c + \gamma_m i_c + q \Lambda_m)}{b^2 \beta^2 N_m - \mu_v N_c \mu_m - \mu_v N_c \gamma_m - \mu_v N_m \mu_m - \mu_v N_m \gamma_m} \tag{S33}$$

Replacing (S33) in (S27) we obtain

$$\frac{dS_c}{dt} = \Lambda_c + \frac{b^2 \beta^2 S_c (\mu_m i_c + \gamma_m i_c + q \Lambda_m)}{b^2 \beta^2 N_m - \mu_v N_c \mu_m - \mu_v N_c \gamma_m - \mu_v N_m \mu_m - \mu_v N_m \gamma_m} - \mu_c S_c$$

and with the approximation  $\Lambda_c = \mu_c S_c$  and  $q = 0$ , this equation (39) takes the form

$$\frac{dS_c}{dt} = \frac{b^2 \beta^2 S_c i_c (\mu_m + \gamma_m)}{b^2 \beta^2 N_m - \mu_v N_c \mu_m - \mu_v N_c \gamma_m - \mu_v N_m \mu_m - \mu_v N_m \gamma_m} \tag{S34}$$

Now, if we substitute (S33) in (S28) and taking  $q = 0$  we obtain

$$\frac{di_c}{dt} = -\frac{b^2 \beta^2 S_c i_c (\mu_m + \gamma_m)}{b^2 \beta^2 N_m - \mu_v N_c \mu_m - \mu_v N_c \gamma_m - \mu_v N_m \mu_m - \mu_v N_m \gamma_m} - \mu_c i_c - \gamma_c i_c \tag{S35}$$

From these two last equations we can define the following effective infectiousness

$$\beta_{eff} = -\frac{b^2 \beta^2 (\mu_m + \gamma_m)}{b^2 \beta^2 N_m - \mu_v N_c \mu_m - \mu_v N_c \gamma_m - \mu_v N_m \mu_m - \mu_v N_m \gamma_m} \tag{S36}$$

Using (S36), we rewrite the equations (S34) and (S35) in the following way

$$\frac{dS_c}{dt} = -\beta_{eff} S_c i_c \tag{S37}$$

$$\frac{di_c}{dt} = \beta_{eff} S_c i_c - \gamma_{c,eff} i_c \tag{S38}$$

where  $\gamma_{c,eff} = \mu_c + \gamma_c$ . With all these approximations the equation (S29) is rewritten as

$$\frac{dR_c}{dt} = \gamma_{c,eff} i_c \tag{S39}$$

Then, we observe that the equations (S37), (S38) and (S39) give us an effective simple SIR model for leishmaniasis.

Now, from (S35) the condition for the existence of an outbreak is

$$-\frac{b^2 \beta^2 S_c i_c (\mu_m + \gamma_m)}{b^2 \beta^2 N_m - \mu_v N_c \mu_m - \mu_v N_c \gamma_m - \mu_v N_m \mu_m - \mu_v N_m \gamma_m} - \mu_c i_c - \gamma_c i_c > 0$$

Then, from here we derive the threshold condition

$$b^2 \beta^2 S_c \mu_m + b^2 \beta^2 S_c \gamma_m + \mu_c b^2 \beta^2 N_m - \mu_c \mu_v N_c \mu_m - \mu_c \mu_v N_c \gamma_m - \mu_c \mu_v N_m \mu_m - \mu_c \mu_v N_m \gamma_m + \gamma_c b^2 \beta^2 N_m - \gamma_c \mu_v N_c \mu_m - \gamma_c \mu_v N_c \gamma_m - \gamma_c \mu_v N_m \mu_m - \gamma_c \mu_v N_m \gamma_m > 0 \tag{S40}$$

The threshold condition is rewritten as

$$R_0 > 1 \tag{S41}$$

where

$$R_0^2 = \frac{b^2 \beta^2 N_c}{\mu_v (\mu_c + \gamma_c) (N_c + N_m)} + \frac{b^2 \beta^2 N_m}{\mu_v (\mu_m + \gamma_m) (N_c + N_m)} \tag{S42}$$

S.2.3. Second Mathematical Model for Leishmaniasis in Tolima-Colombia

In Tolima case, we also can consider the following model

$$\frac{dS_v}{dt} = \Lambda_v - \frac{b\beta S_v i_m}{N_c + N_m} - \frac{b\beta S_v i_c}{N_c + N_m} - \mu_v S_v \tag{S43}$$

$$\frac{di_v}{dt} = \frac{b\beta S_v i_m}{N_c + N_m} + \frac{b\beta S_v i_c}{N_c + N_m} - \mu_v i_v \tag{S44}$$

$$\frac{dS_c}{dt} = \Lambda_c - \frac{b\beta S_c i_v}{N_v} - \mu_c S_c - m_1 S_c + m_2 S_m \tag{S45}$$

$$\frac{di_c}{dt} = \frac{b\beta S_c i_v}{N_v} - \mu_c i_c - \gamma_c i_c \tag{S46}$$

$$\frac{dR_c}{dt} = -\mu_c R_c + \gamma_c i_c + m_2 R_m - m_1 R_c \tag{S47}$$

$$\frac{dS_m}{dt} = \Lambda_a - \frac{b\beta S_m i_v}{N_v} - \mu_m S_m + m_1 S_c - m_2 S_m \tag{S48}$$

$$\frac{di_m}{dt} = \Lambda_b + \frac{b\beta S_m i_v}{N_v} - \mu_m i_m - \gamma_m i_m \tag{S49}$$

$$\frac{dR_m}{dt} = -\mu_m R_m + \gamma_m i_m - m_2 R_m + m_1 R_c \tag{S50}$$

The equations (S59)for vectors (*Phlebotomus*), equations (S27) are for civilian individuals; equations (S30) are for military individuals. According to this model, the military individuals move between jungle and urban zones ( $\Lambda_a$  and  $\Lambda_b$ ; the movement of troops between modeled region and other areas is also captured in these constants). The individuals can be recruited into military from civilians as rate  $m_1$  and can leave military population at the rate  $m_2$ . The following figure contains flow-chart of the model, it includes recover compartment for military population and is taking account mobility between military and civilian populations.

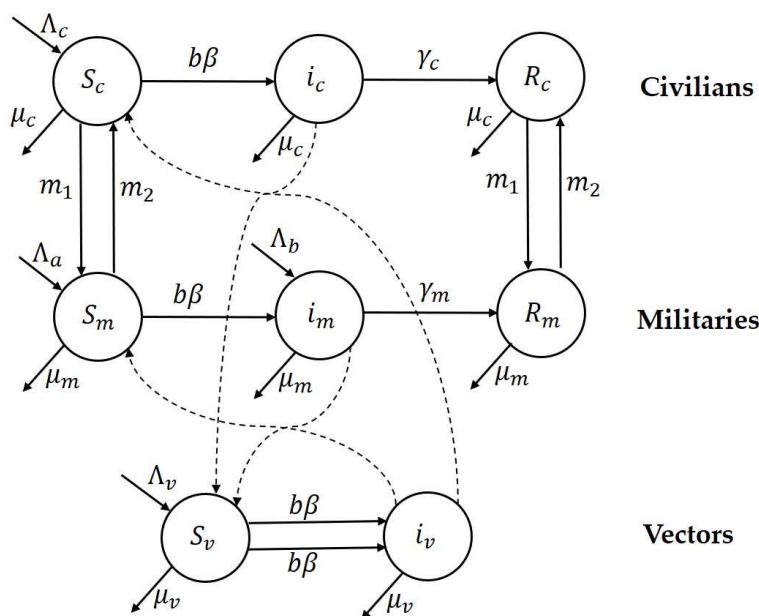

**Figure S3.** Flow chart representing the second mathematical model for Tolima.

It is easy to see that the equilibrium point of our system (S25) is

$$E^* = (S_v^*, i_v^*, S_c^*, i_c^*, R_c^*, S_m^*, i_m^*, R_m^*) = \left( \frac{\Lambda_v}{\mu_v}, 0, S_c^*, 0, 0, S_m^*, 0, 0 \right) \quad (S51)$$

where

$$S_c^* = \frac{(\mu_m + m_2)\Lambda_c + m_2\Lambda_m}{(\mu_m + m_2)(\mu_c + m_1) - m_1m_2} \quad (S52)$$

and

$$S_m^* = \frac{(\mu_c + m_1)\Lambda_m + m_1\Lambda_c}{(\mu_m + m_2)(\mu_c + m_1) - m_1m_2} \quad (S53)$$

We use the new generation matrix approach to calculate the basic reproduction number for our system (S25). Then, the vector of new infection rates is

$$\mathcal{F} = \begin{pmatrix} \frac{b\beta S_v i_m}{N_c + N_m} + \frac{b\beta S_v i_c}{N_c + N_m} \\ \frac{b\beta S_v i_v}{N_v} \\ \frac{b\beta S_m i_v}{N_v} \end{pmatrix} \quad (S54)$$

and the vector of all other rates is

$$\mathcal{V} = \begin{pmatrix} \mu_v i_v \\ (\mu_c + \gamma_c) i_c \\ (\mu_m + \gamma_m) i_m \end{pmatrix} \quad (S55)$$

Then, the next generation matrix is

$$B = FV^{-1} = D\mathcal{F}(E^*)D\mathcal{V}(E^*) = \begin{pmatrix} 0 & \frac{b\beta S_v^*}{(N_c + N_m)(\mu_c + \gamma_c)} & \frac{b\beta S_v^*}{(N_c + N_m)(\mu_m + \gamma_m)} \\ \frac{b\beta S_c^*}{\mu_v N_v} & 0 & 0 \\ \frac{b\beta S_m^*}{\mu_v N_v} & 0 & 0 \end{pmatrix} \quad (S56)$$

and we obtain the basic reproductive as

$$R_0^2 = \frac{b^2\beta^2 S_v^* S_c^*}{\mu_v N_v (N_c + N_m)(\mu_c + \gamma_c)} + \frac{b^2\beta^2 S_v^* S_m^*}{\mu_v N_v (N_c + N_m)(\mu_m + \gamma_m)} \quad (S57)$$

or

$$R_0^2 = \frac{b^2\beta^2 \Lambda_v \left( (\mu_m + m_2)\Lambda_c + m_2\Lambda_m \right)}{\mu_v^2 N_v (N_c + N_m)(\mu_c + \gamma_c) \left( (\mu_m + m_2)(\mu_c + m_1) - m_1m_2 \right)} + \frac{b^2\beta^2 \Lambda_v \left( (\mu_c + m_1)\Lambda_m + m_1\Lambda_c \right)}{\mu_v^2 N_v (N_c + N_m)(\mu_c + \gamma_c) \left( (\mu_m + m_2)(\mu_c + m_1) - m_1m_2 \right)} \quad (S58)$$

### S.3. Parameter estimation procedure

#### S.3.1. Spain case

The effective SIR model (S17), (S20) and (S21) can be solved approximately as

$$R(t) = \frac{\rho^2 \left( \frac{s}{\rho} - 1 - \alpha \tanh(-0.5\alpha\gamma_h t + \phi) \right)}{s} \tag{S59}$$

where  $s = N_h$ ; and

$$\alpha = \sqrt{\left(\frac{s}{\rho} - 1\right)^2 + \frac{2s}{\rho^2}} \tag{S60}$$

$$\phi = \frac{1}{2} \ln \left( \frac{\alpha\rho + s - \rho}{\alpha\rho - s + \rho} \right) \tag{S61}$$

$$\rho = \frac{\gamma_h}{\beta} \tag{S62}$$

with  $R(t) = Z_h(t)$ ,  $\beta = \beta_{eff}$  and  $\gamma_h = \gamma_{eff,h}$ .

Estimation using the observed curve of accumulated cases

Now, we use (S59) to fit the observed curve of accumulated cases. In section 5.4. is included the corresponding code to obtain the following results

| Descriptive Statistics for Variables |                |                |                |               |         |
|--------------------------------------|----------------|----------------|----------------|---------------|---------|
| Variable                             | Minimum value  | Maximum value  | Mean value     | Standard dev. |         |
| Mes                                  | 7              | 39             | 23             | 9.66954       |         |
| TC                                   | 1              | 266            | 109.8182       | 98.22438      |         |
| Calculated Parameter Values          |                |                |                |               |         |
| Parameter                            | Initial guess  | Final estimate | Standard error | t             | Prob(t) |
| Gamma                                | 1E-005         | 0.0859279745   | 0.01518749     | 5.66          | 0.00001 |
| Beta                                 | 1E-007         | 0.000480881087 | 5.542945E-005  | 8.68          | 0.00001 |
| s                                    | 1E+006         | 711.877322     | 68.45965       | 10.40         | 0.00001 |
| Analysis of Variance                 |                |                |                |               |         |
| Source                               | DF             | Sum of Squares | Mean Square    | F value       | Prob(F) |
| Regression                           | 2              | 307892         | 153946         | 5465.86       | 0.00001 |
| Error                                | 30             | 844.9504       | 28.16501       |               |         |
| Total                                | 32             | 308736.9       |                |               |         |
| 90.000% Confidence Intervals         |                |                |                |               |         |
| Parameter                            | Lower limit    | Best estimate  | Upper limit    |               |         |
| gamma                                | 0.0601512357   | 0.0859279745   | 0.111704713    |               |         |
| beta                                 | 0.000386804281 | 0.000480881087 | 0.000574957893 |               |         |
| s                                    | 595.685198     | 711.877322     | 828.069447     |               |         |

The best estimates for the parameters are

$$s_h = 711.877322 \qquad \beta_{eff} = 0.000480881087 \qquad \gamma_{eff,h} = 0.0859279745$$

Using such values, we obtain that  $R_0^2 = 3.983898636$ .

Estimation using the observed incidence curve (Method 1)

Taking the temporal derivative of (S59) we obtain the theoretical incidence curve given by

$$\frac{dR}{dt}(t) = \frac{1}{2} \frac{\rho^2 \alpha^2 \gamma}{s \cosh\left(-\frac{\alpha\gamma}{2}t + \phi\right)^2} \tag{S63}$$



and we use this to fix the observed curve of incidence. In section S.4. is included the corresponding code to obtain the following results

| Descriptive Statistics for Variables |                |                |                |               |         |
|--------------------------------------|----------------|----------------|----------------|---------------|---------|
| Variable                             | Minimum value  | Maximum value  | Mean value     | Standard dev. |         |
| Mes                                  | 7              | 39             | 23             | 9.66954       |         |
| INC                                  | 0              | 31             | 8.060606       | 6.576185      |         |
| Calculated Parameter Values          |                |                |                |               |         |
| Parameter                            | Initial guess  | Final estimate | Standard error | t             | Prob(t) |
| Gamma                                | 1E-010         | 0.116995258    | 0.07885037     | 1.48          | 0.14830 |
| Beta                                 | 1E-009         | 0.000569267647 | 0.000206206    | 2.76          | 0.00974 |
| s                                    | 1900           | 629.288339     | 139.822        | 4.50          | 0.00010 |
| Analysis of Variance                 |                |                |                |               |         |
| Source                               | DF             | Sum of Squares | Mean Square    | F value       | Prob(F) |
| Regression                           | 2              | 954.631        | 477.3155       | 33.36         | 0.00001 |
| Error                                | 30             | 429.2478       | 14.30826       |               |         |
| Total                                | 32             | 1383.879       |                |               |         |
| 95.000% Confidence Intervals         |                |                |                |               |         |
| Parameter                            | Lower limit    | Best estimate  | Upper limit    |               |         |
| gamma                                | -0.0440382383  | 0.116995258    | 0.278028755    |               |         |
| beta                                 | 0.000148139901 | 0.000569267647 | 0.000990395392 |               |         |
| s                                    | 343.734575     | 629.288339     | 914.842104     |               |         |

The best estimates for the parameters are

$$s_h = 629.288339 \quad \beta_{eff} = 0.000569267647 \quad \gamma_{eff,h} = 0.116995258$$

Using these values, we obtain  $R_0^2 = 3.061948818$ .

Estimation using the observed curve of accumulated cases (Method 2)

Other method to obtain the theoretical incidence is to use (S59) two successive times and take the difference between such two times, namely

$$Inc(t) = \frac{\rho^2 \left( \frac{s}{\rho} - 1 - \alpha \tanh \left( -\frac{\alpha\gamma}{2} t + \phi \right) \right)}{s} - \frac{\rho^2 \left( \frac{s}{\rho} - 1 - \alpha \tanh \left( -\frac{\alpha\gamma}{2} (t - 1) + \phi \right) \right)}{s} \quad (S64)$$

This equation can be simplified as

$$Inc(t) = \frac{\rho^2 \alpha \left( \tanh \left( -\frac{\alpha\gamma}{2} t + \phi \right) - \tanh \left( -\frac{\alpha\gamma}{2} t + \frac{\alpha\gamma}{2} + \phi \right) \right)}{s} \quad (S65)$$

We use (S65) to fix the observed curve of incidence. In section S.4. is included the corresponding code to obtain the following results

| Descriptive Statistics for Variables |               |                |                |               |         |
|--------------------------------------|---------------|----------------|----------------|---------------|---------|
| Variable                             | Minimum value | Maximum value  | Mean value     | Standard dev. |         |
| Mes                                  | 7             | 39             | 23             | 9.66954       |         |
| TC                                   | 0             | 31             | 8.060606       | 6.576185      |         |
| Calculated Parameter Values          |               |                |                |               |         |
| Parameter                            | Initial guess | Final estimate | Standard error | t             | Prob(t) |
| Gamma                                | 1E-005        | 0.131176236    | 0.0869062      | 1.51          | 0.14166 |
| Beta                                 | 1E-014        | 0.000614420024 | 0.0002060138   | 2.98          | 0.00563 |
| s                                    | 6000          | 606.396847     | 109.9455       | 5.52          | 0.00001 |
| Analysis of Variance                 |               |                |                |               |         |

| Source                       | DF            | Sum of Squares | Mean Square   | F value | Prob(F) |
|------------------------------|---------------|----------------|---------------|---------|---------|
| Regression                   | 2             | 954.6061       | 477.3155      | 33.36   | 0.00001 |
| Error                        | 30            | 429.2727       | 14.30909      |         |         |
| Total                        | 32            | 1383.879       |               |         |         |
| 95.000% Confidence Intervals |               |                |               |         |         |
| Parameter                    | Lower limit   | Best estimate  | Upper limit   |         |         |
| gamma                        | -0.0463094127 | 0.131176236    | 0.308661885   |         |         |
| beta                         | 0.00019368491 | 0.000614420024 | 0.00103515514 |         |         |
| s                            | 381.858844    | 606.396847     | 830.934849    |         |         |

The best estimates for the parameters are

$$s_h = 606.396847 \quad \beta_{eff} = 0.000614420024 \quad \gamma_{eff,h} = 0.131176236$$

Using these values, we obtain  $R_0^2 = 2.840319075$ .

### S.3.2. Colombia case

The effective SIR model for Tolima-Colombia (S37), (S38) and (S39) has essentially the same solution of the effective SIR model for Madrid-Spain, given by equations (S59)-(S62) with  $s = N_c$ ,  $R(t) = R_c(t)$ ,  $\beta = \beta_{eff}$  and  $\gamma_h = \gamma_{c,eff}$ . Then, we use again (S59) to fix the observed curve of accumulated cases for each outbreak in Tolima-Colombia. Section S.5. contains the corresponding code to obtain the following results,

#### Estimation using the observed curve of accumulated cases

##### First outbreak

| Descriptive Statistics for Variables |               |                |                |               |         |
|--------------------------------------|---------------|----------------|----------------|---------------|---------|
| Variable                             | Minimum value | Maximum value  | Mean value     | Standard dev. |         |
| Mes                                  | 1             | 35             | 18             | 10.24695      |         |
| TC                                   | 1             | 1825           | 790.1429       | 723.2331      |         |
| Calculated Parameter Values          |               |                |                |               |         |
| Parameter                            | Initial guess | Final estimate | Standard error | t             | Prob(t) |
| Gamma                                | 1E-005        | 1.13165588     | 0              | 1.0E+030      | 0.00001 |
| Beta                                 | 1E-007        | 0.000272524001 | 0              | 1.0E+030      | 0.00001 |
| s                                    | 1E+006        | 5288.63267     | 0              | 1.0E+030      | 0.00001 |
| Analysis of Variance                 |               |                |                |               |         |
| Source                               | DF            | Sum of Squares | Mean Square    | F value       | Prob(F) |
| Regression                           | 2             | 1.776487E+007  | 8882433        | 14665.54      | 0.00001 |
| Error                                | 32            | 19381.34       | 605.6669       |               |         |
| Total                                | 34            | 1.778425E+007  |                |               |         |

Unable to compute confidence intervals because the covariance matrix could not be computed.

The best estimates for the parameters are

$$s_c = 5288.63267, \quad \beta_{eff} = 0.000272524001, \quad \gamma_{c,eff} = 1.13165588.$$

Using such values, we obtain that  $R_0^2 = 1.273602126$ .

##### Second outbreak

| Descriptive Statistics for Variables |               |               |            |               |  |
|--------------------------------------|---------------|---------------|------------|---------------|--|
| Variable                             | Minimum value | Maximum value | Mean value | Standard dev. |  |
| Mes                                  | 1             | 19            | 10         | 5.627314      |  |
| TC                                   | 20            | 1398          | 721.4211   | 518.8136      |  |

| Calculated Parameter Values |               |                |                |          |         |
|-----------------------------|---------------|----------------|----------------|----------|---------|
| Parameter                   | Initial guess | Final estimate | Standard error | t        | Prob(t) |
| Gamma                       | 1E-005        | 16.5969        | 16.5969        | 0        | 0.00001 |
| Beta                        | 1E-007        | 0.000412022367 | 0              | 1.0E+030 | 0.00001 |
| s                           | 1000          | 1E-007         | 0.000412022367 | 1.0E+030 | 0.00001 |
| Analysis of Variance        |               |                |                |          |         |
| Source                      | DF            | Sum of Squares | Mean Square    | F value  | Prob(F) |
| Regression                  | 2             | 4836994        | 2418497        | 4823.58  | 0.00001 |
| Error                       | 16            | 8022.241       | 501.3901       |          |         |
| Total                       | 318           | 4845017        |                |          |         |

Unable to compute confidence intervals because the covariance matrix could not be computed.

The best estimates for the parameters are

$$s_c = 41031.1717, \quad \beta_{eff} = 0.000412022367, \quad \gamma_{c,eff} = 16.5969.$$

Using such values, we obtain that  $R_0^2 = 1.018609528$ .

#### Estimation using the observed incidence curve (Method 1)

Here we use (S63) to fix the observed curves of incidence for the two outbreaks. In section S.5. is included the corresponding code to obtain the following results.

#### First outbreak

| Descriptive Statistics for Variables |               |                |                |               |         |
|--------------------------------------|---------------|----------------|----------------|---------------|---------|
| Variable                             | Minimum value | Maximum value  | Mean value     | Standard dev. |         |
| Mes                                  | 1             | 35             | 18             | 10.24695      |         |
| TC                                   | 0             | 145            | 52.11429       | 48.82669      |         |
| Calculated Parameter Values          |               |                |                |               |         |
| Parameter                            | Initial guess | Final estimate | Standard error | t             | Prob(t) |
| Gamma                                | 1E-010        | 1.4768931      | 0              | 1.0E+030      | 0.00001 |
| Beta                                 | 1E-009        | 0.000265678781 | 0              | 1.0E+030      | 0.00001 |
| s                                    | 1900          | 6656.64572     | 0              | 1.0E+030      | 0.00001 |
| Analysis of Variance                 |               |                |                |               |         |
| Source                               | DF            | Sum of Squares | Mean Square    | F value       | Prob(F) |
| Regression                           | 2             | 70974.4        | 35487.2        | 112.62        | 0.00001 |
| Error                                | 32            | 10083.15       | 315.0983       |               |         |
| Total                                | 34            | 81057.54       |                |               |         |

Unable to compute confidence intervals because the covariance matrix could not be computed.

The best estimates for the parameters are

$$s_c = 6656.64572, \quad \beta_{eff} = 0.000265678781, \quad \gamma_{c,eff} = 1.4768931.$$

Using such values, we obtain that  $R_0^2 = 1.197466167$ .

#### Second outbreak

| Descriptive Statistics for Variables |               |               |            |               |  |
|--------------------------------------|---------------|---------------|------------|---------------|--|
| Variable                             | Minimum value | Maximum value | Mean value | Standard dev. |  |
| Mes                                  | 1             | 17            | 9          | 5.049752      |  |
| TC                                   | 20            | 142           | 82         | 40.02031      |  |

| Calculated Parameter Values |               |                |                |          |         |
|-----------------------------|---------------|----------------|----------------|----------|---------|
| Parameter                   | Initial guess | Final estimate | Standard error | t        | Prob(t) |
| Gamma                       | 1E-010        | 14.4743765     | 0              | 1.0E+030 | 0.00001 |
| Beta                        | 1E-009        | 14.4743765     | 0              | 1.0E+030 | 0.00001 |
| s                           | 1900          | 38706.6128     | 0              | 1.0E+030 | 0.00001 |
| Analysis of Variance        |               |                |                |          |         |
| Source                      | DF            | Sum of Squares | Mean Square    | F value  | Prob(F) |
| Regression                  | 2             | 20965.65       | 10482.82       | 31.49    | 0.00001 |
| Error                       | 14            | 31.49          | 332.8822       |          |         |
| Total                       | 16            | 25626          |                |          |         |

Unable to compute confidence intervals because the covariance matrix could not be computed.

The best estimates for the parameters are

$$s_c = 38706.6128, \quad \beta_{eff} = 0.000381686495, \quad \gamma_{c,eff} = 14.4743765.$$

Using such values, we obtain that  $R_0^2 = 1.020685856$ .

#### Estimation using the observed curve of accumulated cases (Method 2)

We use (S65) to fix the observed curve of incidence for the two outbreaks. Section S.5. contains the corresponding code to obtain the following results.

#### First outbreak

| Descriptive Statistics for Variables |               |                |                |               |         |
|--------------------------------------|---------------|----------------|----------------|---------------|---------|
| Variable                             | Minimum value | Maximum value  | Mean value     | Standard dev. |         |
| Mes                                  | 1             | 35             | 18             | 10.24695      |         |
| TC                                   | 0             | 145            | 52.11429       | 48.82669      |         |
| Calculated Parameter Values          |               |                |                |               |         |
| Parameter                            | Initial guess | Final estimate | Standard error | t             | Prob(t) |
| Gamma                                | 1E-005        | 1.69342128     | 0              | 1.0E+030      | 0.00001 |
| Beta                                 | 0.001         | 0.000271912627 | 0              | 1.0E+030      | 0.00001 |
| s                                    | 6000          | 7301.4638      | 0              | 1.0E+030      | 0.00001 |
| Analysis of Variance                 |               |                |                |               |         |
| Source                               | DF            | Sum of Squares | Mean Square    | F value       | Prob(F) |
| Regression                           | 2             | 70975.79       | 35487.9        | 112.64        | 0.00001 |
| Error                                | 32            | 10081.75       | 315.0547       |               |         |
| Total                                | 34            | 81057.54       |                |               |         |

Unable to compute confidence intervals because the covariance matrix could not be computed.

The best estimates for the parameters are

$$s_c = 7301.4638, \quad \beta_{eff} = 0.000271912627, \quad \gamma_{c,eff} = 1.69342128.$$

Using such values, we obtain that  $R_0^2 = 1.172395922$ .

#### Second outbreak

| Descriptive Statistics for Variables |               |               |            |               |  |
|--------------------------------------|---------------|---------------|------------|---------------|--|
| Variable                             | Minimum value | Maximum value | Mean value | Standard dev. |  |
| Mes                                  | 1             | 17            | 9          | 5.049752      |  |
| TC                                   | 20            | 142           | 82         | 40.02031      |  |
| Calculated Parameter Values          |               |               |            |               |  |

| Parameter            | Initial guess | Final estimate | Standard error | t        | Prob(t) |
|----------------------|---------------|----------------|----------------|----------|---------|
| Gamma                | 1E-005        | 16.7143009     | 0              | 1.0E+030 | 0.00001 |
| Beta                 | 0.001         | 0.000383782873 | 0              | 1.0E+030 | 0.00001 |
| s                    | 6000          | 44325.8656     | 0              | 1.0E+030 | 0.00001 |
| Analysis of Variance |               |                |                |          |         |
| Source               | DF            | Sum of Squares | Mean Square    | F value  | Prob(F) |
| Regression           | 2             | 20964.59       | 10482.3        | 31.48    | 0.00001 |
| Error                | 14            | 4661.407       | 332.9576       |          |         |
| Total                | 16            | 25626          |                |          |         |

Unable to compute confidence intervals because the covariance matrix could not be computed.

The best estimates for the parameters are

$$s_c = 44325.8656, \quad \beta_{eff} = 0.000383782873, \quad \gamma_{c,eff} = 16.7143009.$$

Using such values, we obtain that  $R_0^2 = 1.017781608$ .

#### S.4. Codes for Spain case

##### S.4.1. Code for estimation using the observed curve of accumulated cases

We use the following code for NLREG:

Title "Casos acumulados de Leishmaniasis";

Variables Mes, TC;

Parameters gamma=0.00001, beta=0.0000001, s=1000000;

Double rho, alpha, phi;

rho=gamma/beta;

alpha = ((s/rho-1)^2+2\*s/rho^2)^(1/2);

phi =1/2\*ln((alpha\*rho+s-rho)/(alpha\*rho-s+rho));

Function TC =rho^2/s\*(s/rho-1-alpha\*tanh(-.5\*alpha\*gamma\*Mes+phi));

Plot xvar=Mes, xlabel="Time (Mes)", ylabel="No casos acumulados";

Plot;

rplot;

CONFIDENCE 90;

Data;

7 1

8 3

9 4

10 5

11 5

12 5

13 9

14 11

15 16

16 19

17 21  
18 23  
19 33  
20 42  
21 54  
22 70  
23 82  
24 98  
25 129  
26 145  
27 158  
28 171  
29 183  
30 190  
31 199  
32 212  
33 225  
34 234  
35 243  
36 252  
37 256  
38 260  
39 266

Executing such code, we obtain the following results

1:  
2: Title "Casos acumulados de Leishmaniasis";  
3: Variables Mes, TC;  
4: Parameters gamma=0.00001, beta=0.0000001, s=1000000;  
5: Double rho, alpha, phi;  
6: rho=gamma/beta;  
7: alpha = ((s/rho-1)^2+2\*s/rho^2)^(1/2);  
8: phi =1/2\*ln((alpha\*rho+s-rho)/(alpha\*rho-s+rho));  
9:  
10: Function TC =rho^2/s\*(s/rho-1-alpha\*tanh(-.5\*alpha\*gamma\*Mes+phi));  
11:  
12:  
13:  
14: Plot xvar=Mes, xlabel="Time (Mes)", ylabel="No casos acumulados";  
15: Plot;  
16: rplot;  
17:  
18:  
19:  
20: CONFIDENCE 90;  
21:  
22: Data;

Beginning computation...  
 Stopped due to: Relative function convergence.

---- Final Results ----

NLREG version 6.5  
 Copyright (c) 1992-2010 Phillip H. Sherrod. All rights reserved.  
 This is a registered copy of NLREG that may not be redistributed.

Casos acumulados de Leishmaniasis  
 Number of observations = 33  
 Maximum allowed number of iterations = 500  
 Convergence tolerance factor = 1.000000E-010  
 Stopped due to: Relative function convergence.  
 Number of iterations performed = 140  
 Final sum of squared deviations = 8.4495041E+002  
 Final sum of deviations = -1.0135371E+001  
 Standard error of estimate = 5.30707  
 Average deviation = 3.71536  
 Maximum deviation for any observation = 12.4725  
 Proportion of variance explained (R<sup>2</sup>) = 0.9973 (99.73%)  
 Adjusted coefficient of multiple determination (Ra<sup>2</sup>) = 0.9971 (99.71%)  
 Durbin-Watson test for autocorrelation = 0.518  
 This Durbin-Watson value indicates autocorrelation or inappropriate function.  
 Analysis completed 12-May-2017 14:51. Runtime = 0.04 seconds.

#### S.4.2. Code for estimation using the observed incidence curve (Method 1)

In this case we use the following NLREG code:

```
Title "Curva de casos nuevos de Leishmaniasis reportados mensualmente";
Variables Mes, INC;
Parameters gamma=0.0000000001, beta=0.000000001, s=1900;
Double rho, alpha, phi;
rho=gamma/beta;
alpha = ((s/rho-1)^2+2*s/rho^2)^(1/2);
phi =1/2*ln((alpha*rho+s-rho)/(alpha*rho-s+rho));

Function INC =((rho^2)*gamma*(alpha^2)/(2*s))*(cosh(-.5*alpha*gamma*Mes+phi))^(-2);

Plot xvar=Mes xlabel="Time (Mes)", ylabel="Número de casos nuevos por mes";
Plot;
rplot;

CONFIDENCE 95;

Data;
```

7 1  
8 2  
9 1  
10 1  
11 0  
12 0  
13 4  
14 2  
15 5  
16 3  
17 2  
18 2  
19 10  
20 9  
21 12  
22 16  
23 12  
24 16  
25 31  
26 16  
27 13  
28 13  
29 12  
30 7  
31 9  
32 13  
33 13  
34 9  
35 9  
36 9  
37 4  
38 4  
39 6

Executing such code, we obtain the following results

- 1:
- 2: Title "Curva de casos nuevos de Leishmaniasis reportados mensualmente";
- 3: Variables Mes, INC;
- 4: Parameters  $\gamma=0.0000000001$ ,  $\beta=0.0000000001$ ,  $s=1900$ ;
- 5: Double rho, alpha, phi;
- 6:  $\rho=\gamma/\beta$ ;
- 7:  $\alpha = ((s/\rho-1)^2+2*s/\rho^2)^{1/2}$ ;
- 8:  $\phi = 1/2*\ln((\alpha*\rho+s-\rho)/(\alpha*\rho-s+\rho))$ ;
- 9:
- 10: Function  $INC = ((\rho^2)*\gamma*(\alpha^2)/(2*s))*(\cosh(-.5*\alpha*\gamma*Mes+\phi))^{(-2)}$ ;
- 11:
- 12:
- 13:



```

14: Plot xvar=Mes xlabel="Time (Mes)", ylabel="Número de casos nuevos por mes";
15: Plot;
16: rplot;
17:
18: CONFIDENCE 95;
19:
20: Data;

```

Beginning computation...

```

Error executing line 8: phi =1/2*ln((alpha*rho+s-rho)/(alpha*rho-s+rho));
Error: Attempt to take log of zero or negative: -1237.72
Stopped due to: Relative function convergence.

```

---- Final Results ----

NLREG version 6.5  
 Copyright (c) 1992-2010 Phillip H. Sherrod. All rights reserved.  
 This is a registered copy of NLREG that may not be redistributed.

Curva de casos nuevos de Leishmaniasis reportados mensualmente  
 Number of observations = 33  
 Maximum allowed number of iterations = 500  
 Convergence tolerance factor = 1.000000E-010  
 Stopped due to: Relative function convergence.  
 Number of iterations performed = 29  
 Final sum of squared deviations = 4.2924779E+002  
 Final sum of deviations = 1.2816608E+000  
 Standard error of estimate = 3.78263  
 Average deviation = 2.47255  
 Maximum deviation for any observation = 14.5582  
 Proportion of variance explained (R^2) = 0.6898 (68.98%)  
 Adjusted coefficient of multiple determination (Ra^2) = 0.6691 (66.91%)  
 Durbin-Watson test for autocorrelation = 1.576  
 Analysis completed 14-May-2017 18:27. Runtime = 0.04 seconds.

#### S.4.3. Code for estimation using the observed curve of accumulated cases (Method 2)

In this case we use the following NLREG code:  
 Title "Curva de casos nuevos de Leishmaniasis reportados mensualmente";  
 Variables Mes, TC;  
 Parameters gamma=0.00001, beta=0.000000000000001, s=6000;  
 Double rho, alpha, phi;  
 rho=gamma/beta;  
 alpha = ((s/rho-1)^2+2\*s/rho^2)^(1/2);  
 phi =1/2\*ln((alpha\*rho+s-rho)/(alpha\*rho-s+rho));

```
Function TC =rho^2/s*(s/rho-1-alpha*tanh(-.5*alpha*gamma*Mes+phi)) - rho^2/s*(s/rho-1-alpha*tanh(-.5*alpha*gamma*(Mes-1)+phi));
```

```
Plot xvar=Mes xlabel="Time (Mes)", ylabel="Número de casos nuevos por mes";  
Plot;  
rplot;
```

```
CONFIDENCE 95;
```

```
Data;
```

```
7 1  
8 2  
9 1  
10 1  
11 0  
12 0  
13 4  
14 2  
15 5  
16 3  
17 2  
18 2  
19 10  
20 9  
21 12  
22 16  
23 12  
24 16  
25 31  
26 16  
27 13  
28 13  
29 12  
30 7  
31 9  
32 13  
33 13  
34 9  
35 9  
36 9  
37 4  
38 4  
39 6
```

Executing such code, we obtain the following results

- 1:
- 2: Title "Curva de casos nuevos de Leishmaniasis reportados mensualmente";

```

3: Variables Mes, TC;
4: Parameters gamma=0.00001, beta=0.000000000000001, s=6000;
5: Double rho, alpha, phi;
6: rho=gamma/beta;
7: alpha = ((s/rho-1)^2+2*s/rho^2)^(1/2);
8: phi =1/2*ln((alpha*rho+s-rho)/(alpha*rho-s+rho));
9:
10: Function TC =rho^2/s*(s/rho-1-alpha*tanh(-.5*alpha*gamma*Mes+phi)) - rho^2/s*(s/rho-1-
alpha*tanh(-.5*alpha*gamma*(Mes-1)+phi));
11:
12:
13:
14: Plot xvar=Mes xlabel="Time (Mes)", ylabel="Número de casos nuevos por mes";
15: Plot;
16: rplot;
17:
18: CONFIDENCE 95;
19:
20: Data;

```

Beginning computation...

Stopped due to: Relative function convergence.

---- Final Results ----

NLREG version 6.5

Copyright (c) 1992-2010 Phillip H. Sherrod. All rights reserved.

This is a registered copy of NLREG that may not be redistributed.

Curva de casos nuevos de Leishmaniasis reportados mensualmente

Number of observations = 33

Maximum allowed number of iterations = 500

Convergence tolerance factor = 1.000000E-010

Stopped due to: Relative function convergence.

Number of iterations performed = 41

Final sum of squared deviations = 4.2927268E+002

Final sum of deviations = 1.2837181E+000

Standard error of estimate = 3.78274

Average deviation = 2.4721

Maximum deviation for any observation = 14.5614

Proportion of variance explained (R<sup>2</sup>) = 0.6898 (68.98%)

Adjusted coefficient of multiple determination (Ra<sup>2</sup>) = 0.6691 (66.91%)

Durbin-Watson test for autocorrelation = 1.576

Analysis completed 14-May-2017 18:49. Runtime = 0.04 seconds.

### S.5. Codes for Colombia case

#### S.5.1. Code for estimation using the observed curve of accumulated cases

First outbreak

```
Title "Casos acumulados de Leishmaniasis";
Variables Semana, TC;
Parameters gamma=0.00001, beta=0.0000001, s=1000000;
Double rho, alpha, phi;
rho=gamma/beta;
alpha = ((s/rho-1)^2+2*s/rho^2)^(1/2);
phi =1/2*ln((alpha*rho+s-rho)/(alpha*rho-s+rho));

Function TC =rho^2/s*(s/rho-1-alpha*tanh(-.5*alpha*gamma*Semana+phi));

Plot xvar=Semana, xlabel="Time (Semana)", ylabel="No casos acumulados";
Plot;
rplot;
```

CONFIDENCE 90;

Data;

|    |      |
|----|------|
| 1  | 1    |
| 2  | 2    |
| 3  | 5    |
| 4  | 10   |
| 5  | 14   |
| 6  | 15   |
| 7  | 21   |
| 8  | 29   |
| 9  | 29   |
| 10 | 50   |
| 11 | 74   |
| 12 | 85   |
| 13 | 145  |
| 14 | 210  |
| 15 | 309  |
| 16 | 413  |
| 17 | 538  |
| 18 | 659  |
| 19 | 794  |
| 20 | 939  |
| 21 | 1032 |
| 22 | 1170 |
| 23 | 1303 |
| 24 | 1381 |
| 25 | 1424 |
| 26 | 1534 |
| 27 | 1591 |

28 1649  
 29 1671  
 30 1703  
 31 1729  
 32 1743  
 33 1770  
 34 1788  
 35 1825

Executing such code, we obtain the following results

1:  
 2: Title "Casos acumulados de Leishmaniasis";  
 3: Variables Semana, TC;  
 4: Parameters gamma=0.00001, beta=0.0000001, s=1000000;  
 5: Double rho, alpha, phi;  
 6: rho=gamma/beta;  
 7: alpha = ((s/rho-1)^2+2\*s/rho^2)^(1/2);  
 8: phi =1/2\*ln((alpha\*rho+s-rho)/(alpha\*rho-s-rho));  
 9:  
 10: Function TC =rho^2/s\*(s/rho-1-alpha\*tanh(-.5\*alpha\*gamma\*Semana+phi));  
 11:  
 12:  
 13:  
 14: Plot xvar=Semana, xlabel="Time (Semana)", ylabel="No casos acumulados";  
 15: Plot;  
 16: rplot;  
 17:  
 18:  
 19:  
 20: CONFIDENCE 90;  
 21:  
 22: Data;

Beginning computation...

Stopped due to: Relative function convergence.

---- Final Results ----

NLREG version 6.5

Copyright (c) 1992-2010 Phillip H. Sherrod. All rights reserved.

This is a registered copy of NLREG that may not be redistributed.

Casos acumulados de Leishmaniasis

Number of observations = 35

Maximum allowed number of iterations = 500

Convergence tolerance factor = 1.000000E-010

Stopped due to: Relative function convergence.

Number of iterations performed = 102

Final sum of squared deviations = 1.9381341E+004  
 Final sum of deviations = -1.4892068E+002  
 Standard error of estimate = 24.6103  
 Average deviation = 17.5432  
 Maximum deviation for any observation = 57.1837  
 Proportion of variance explained (R<sup>2</sup>) = 0.9989 (99.89%)  
 Adjusted coefficient of multiple determination (Ra<sup>2</sup>) = 0.9988 (99.88%)  
 Durbin-Watson test for autocorrelation = 0.542  
 This Durbin-Watson value indicates autocorrelation or inappropriate function.

Warning: Covariance matrix could not be computed because the finite-difference Hessian was indefinite.

Analysis completed 18-May-2017 16:20. Runtime = 0.05 seconds.

Second outbreak

Title "Casos acumulados de Leishmaniasis";

Variables Semana, TC;

Parameters gamma=0.00001, beta=0.0000001, s=1000;

Double rho, alpha, phi;

rho=gamma/beta;

alpha = ((s/rho-1)<sup>2</sup>+2\*s/rho<sup>2</sup>)<sup>(1/2)</sup>;

phi = 1/2\*ln((alpha\*rho+s-rho)/(alpha\*rho-s+rho));

Function TC =rho<sup>2</sup>/s\*(s/rho-1-alpha\*tanh(-.5\*alpha\*gamma\*Semana+phi));

Plot xvar=Semana, xlabel="Time (Semana)", ylabel="No casos acumulados";

Plot;

rplot;

CONFIDENCE 90;

Data;

|    |      |
|----|------|
| 1  | 20   |
| 2  | 56   |
| 3  | 93   |
| 4  | 135  |
| 5  | 199  |
| 6  | 299  |
| 7  | 349  |
| 8  | 443  |
| 9  | 561  |
| 10 | 703  |
| 11 | 827  |
| 12 | 938  |
| 13 | 1080 |

14 1181  
 15 1272  
 16 1363  
 17 1394  
 18 1396  
 19 1398

Executing such code, we obtain the following results

1:  
 2: Title "Casos acumulados de Leishmaniasis";  
 3: Variables Semana, TC;  
 4: Parameters gamma=0.00001, beta=0.0000001, s=1000;  
 5: Double rho, alpha, phi;  
 6: rho=gamma/beta;  
 7: alpha = ((s/rho-1)^2+2\*s/rho^2)^(1/2);  
 8: phi =1/2\*ln((alpha\*rho+s-rho)/(alpha\*rho-s+rho));  
 9:  
 10: Function TC =rho^2/s\*(s/rho-1-alpha\*tanh(-.5\*alpha\*gamma\*Semana+phi));  
 11:  
 12:  
 13:  
 14: Plot xvar=Semana, xlabel="Time (Semana)", ylabel="No casos acumulados";  
 15: Plot;  
 16: rplot;  
 17:  
 18:  
 19:  
 20: CONFIDENCE 90;  
 21:  
 22: Data;

Beginning computation...

Stopped due to: Both parameter and relative function convergence.

---- Final Results ----

NLREG version 6.5

Copyright (c) 1992-2010 Phillip H. Sherrod. All rights reserved.

This is a registered copy of NLREG that may not be redistributed.

Casos acumulados de Leishmaniasis

Number of observations = 19

Maximum allowed number of iterations = 500

Convergence tolerance factor = 1.000000E-010

Stopped due to: Both parameter and relative function convergence.

Number of iterations performed = 109

Final sum of squared deviations = 8.0222411E+003

Final sum of deviations = 4.3831294E+001

Standard error of estimate = 22.3917  
 Average deviation = 16.407  
 Maximum deviation for any observation = 43.7928  
 Proportion of variance explained ( $R^2$ ) = 0.9983 (99.83%)  
 Adjusted coefficient of multiple determination ( $R_a^2$ ) = 0.9981 (99.81%)  
 Durbin-Watson test for autocorrelation = 0.898

Warning: Covariance matrix could not be computed because the finite-difference Hessian was indefinite.

Analysis completed 19-May-2017 06:05. Runtime = 0.03 seconds.

### S.5.2. Code for estimation using the observed incidence curve (Method 1)

#### First outbreak

```
Title "Curva de casos nuevos de Leishmaniasis reportados semanalmente";
Variables Semana, INC;
Parameters gamma=0.0000000001, beta=0.0000000001, s=1900;
Double rho, alpha, phi;
rho=gamma/beta;
alpha = ((s/rho-1)^2+2*s/rho^2)^(1/2);
phi =1/2*ln((alpha*rho+s-rho)/(alpha*rho-s+rho));

Function INC =((rho^2)*gamma*(alpha^2)/(2*s))*(cosh(-.5*alpha*gamma*Semana+phi))^(-2);

Plot xvar=Semana xlabel="Time (Semana)", ylabel="Número de casos nuevos por semana";
Plot;
rplot;

CONFIDENCE 95;

Data;

1 1
2 1
3 3
4 5
5 4
6 1
7 6
8 8
9 0
10 21
11 24
12 9
13 60
14 65
```



15 99  
 16 104  
 17 125  
 18 121  
 19 135  
 20 145  
 21 93  
 22 138  
 23 133  
 24 78  
 25 43  
 26 110  
 27 57  
 28 58  
 29 22  
 30 32  
 31 26  
 32 14  
 33 27  
 34 18  
 35 38

Executing such code, we obtain the following results

1:  
 2: Title "Curva de casos nuevos de Leishmaniasis reportados semanalmente";  
 3: Variables Semana, INC;  
 4: Parameters gamma=0.0000000001, beta=0.0000000001, s=1900;  
 5: Double rho, alpha, phi;  
 6: rho=gamma/beta;  
 7: alpha = ((s/rho-1)^2+2\*s/rho^2)^(1/2);  
 8: phi =1/2\*ln((alpha\*rho+s-rho)/(alpha\*rho-s-rho));  
 9:  
 10: Function INC =((rho^2)\*gamma\*(alpha^2)/(2\*s))\*(cosh(-.5\*alpha\*gamma\*Semana+phi))^(-2);  
 11:  
 12:  
 13:  
 14: Plot xvar=Semana xlabel="Time (Semana)", ylabel="Número de casos nuevos por semana";  
 15: Plot;  
 16: rplot;  
 17:  
 18: CONFIDENCE 95;  
 19:  
 20: Data;

Beginning computation...

Stopped due to: Relative function convergence.

---- Final Results ----

NLREG version 6.5  
 Copyright (c) 1992-2010 Phillip H. Sherrod. All rights reserved.  
 This is a registered copy of NLREG that may not be redistributed.

Curva de casos nuevos de Leishmaniasis reportados semanalmente  
 Number of observations = 35  
 Maximum allowed number of iterations = 500  
 Convergence tolerance factor = 1.000000E-010  
 Stopped due to: Relative function convergence.  
 Number of iterations performed = 21  
 Final sum of squared deviations = 1.0083147E+004  
 Final sum of deviations = 6.2758196E+000  
 Standard error of estimate = 17.751  
 Average deviation = 12.1321  
 Maximum deviation for any observation = 41.0307  
 Proportion of variance explained (R<sup>2</sup>) = 0.8756 (87.56%)  
 Adjusted coefficient of multiple determination (Ra<sup>2</sup>) = 0.8678 (86.78%)  
 Durbin-Watson test for autocorrelation = 2.100

Warning: Covariance matrix could not be computed because  
 the finite-difference Hessian was indefinite.

Analysis completed 19-May-2017 10:03. Runtime = 0.04 seconds.

Second outbreak

Title "Curva de casos nuevos de Leishmaniasis reportados semanalmente";  
 Variables Semana, INC;  
 Parameters gamma=0.0000000001, beta=0.000000001, s=1900;  
 Double rho, alpha, phi;  
 rho=gamma/beta;  
 alpha = ((s/rho-1)<sup>2</sup>+2\*s/rho<sup>2</sup>)<sup>(1/2)</sup>;  
 phi =1/2\*ln((alpha\*rho+s-rho)/(alpha\*rho-s+rho));

Function INC =((rho<sup>2</sup>)\*gamma\*(alpha<sup>2</sup>)/(2\*s))\*(cosh(-.5\*alpha\*gamma\*Semana+phi))<sup>(-2)</sup>;

Plot xvar=Semana xlabel="Time (Semana)", ylabel="Número de casos nuevos por semana";  
 Plot;  
 rplot;

CONFIDENCE 95;

Data;

1 20  
 2 36  
 3 37

4 42  
 5 64  
 6 100  
 7 50  
 8 94  
 9 118  
 10 142  
 11 124  
 12 111  
 13 142  
 14 101  
 15 91  
 16 91  
 17 31

Executing such code, we obtain the following results

1:  
 2: Title "Curva de casos nuevos de Leishmaniasis reportados semanalmente";  
 3: Variables Semana, INC;  
 4: Parameters gamma=0.0000000001, beta=0.0000000001, s=1900;  
 5: Double rho, alpha, phi;  
 6: rho=gamma/beta;  
 7: alpha = ((s/rho-1)^2+2\*s/rho^2)^(1/2);  
 8: phi =1/2\*ln((alpha\*rho+s-rho)/(alpha\*rho-s+rho));  
 9:  
 10: Function INC =((rho^2)\*gamma\*(alpha^2)/(2\*s))\*(cosh(-.5\*alpha\*gamma\*Semana+phi))^(-2);  
 11:  
 12:  
 13:  
 14: Plot xvar=Semana xlabel="Time (Semana)", ylabel="Número de casos nuevos por semana";  
 15: Plot;  
 16: rplot;  
 17:  
 18: CONFIDENCE 95;  
 19:  
 20: Data;

Beginning computation...

Stopped due to: Relative function convergence.

---- Final Results ----

NLREG version 6.5

Copyright (c) 1992-2010 Phillip H. Sherrod. All rights reserved.

This is a registered copy of NLREG that may not be redistributed.

Curva de casos nuevos de Leishmaniasis reportados semanalmente

Number of observations = 17

Maximum allowed number of iterations = 500  
 Convergence tolerance factor = 1.000000E-010  
 Stopped due to: Relative function convergence.  
 Number of iterations performed = 60  
 Final sum of squared deviations = 4.6603509E+003  
 Final sum of deviations = 4.6897275E+000  
 Standard error of estimate = 18.2451  
 Average deviation = 12.3967  
 Maximum deviation for any observation = 37.4176  
 Proportion of variance explained (R<sup>2</sup>) = 0.8181 (81.81%)  
 Adjusted coefficient of multiple determination (Ra<sup>2</sup>) = 0.7922 (79.22%)  
 Durbin-Watson test for autocorrelation = 2.452

Warning: Covariance matrix could not be computed because the finite-difference Hessian was indefinite.

Analysis completed 19-May-2017 10:13. Runtime = 0.04 seconds.

### S.5.3. Code for estimation using the observed curve of accumulated cases (Method 2)

#### First outbreak

Title "Curva de casos nuevos de Leishmaniasis reportados semanalmente";  
 Variables Semana, TC;  
 Parameters gamma=0.00001, beta=0.001, s=6000;  
 Double rho, alpha, phi;  
 rho=gamma/beta;  
 alpha = ((s/rho-1)<sup>2</sup>+2\*s/rho<sup>2</sup>)<sup>(1/2)</sup>;  
 phi =1/2\*ln((alpha\*rho+s-rho)/(alpha\*rho-s+rho));

Function TC =rho<sup>2</sup>/s\*(s/rho-1-alpha\*tanh(-.5\*alpha\*gamma\*Semana+phi)) - rho<sup>2</sup>/s\*(s/rho-1-alpha\*tanh(-.5\*alpha\*gamma\*(Semana-1)+phi));

Plot xvar=Semana xlabel="Time (Mes)", ylabel="Número de casos nuevos por semana";  
 Plot;  
 rplot;

CONFIDENCE 95;

Data;

1 1  
 2 1  
 3 3  
 4 5  
 5 4

6 1  
 7 6  
 8 8  
 9 0  
 10 21  
 11 24  
 12 9  
 13 60  
 14 65  
 15 99  
 16 104  
 17 125  
 18 121  
 19 135  
 20 145  
 21 93  
 22 138  
 23 133  
 24 78  
 25 43  
 26 110  
 27 57  
 28 58  
 29 22  
 30 32  
 31 26  
 32 14  
 33 27  
 34 18  
 35 38

Executing such code, we obtain the following results

1:  
 2: Title "Curva de casos nuevos de Leishmaniasis reportados semanalmente";  
 3: Variables Semana, TC;  
 4: Parameters gamma=0.00001, beta=0.001, s=6000;  
 5: Double rho, alpha, phi;  
 6: rho=gamma/beta;  
 7: alpha = ((s/rho-1)^2+2\*s/rho^2)^(1/2);  
 8: phi =1/2\*ln((alpha\*rho+s-rho)/(alpha\*rho-s-rho));  
 9:  
 10: Function TC =rho^2/s\*(s/rho-1-alpha\*tanh(-.5\*alpha\*gamma\*Semana+phi)) - rho^2/s\*(s/rho-1-alpha\*tanh(-.5\*alpha\*gamma\*(Semana-1)+phi));  
 11:  
 12:  
 13:  
 14: Plot xvar=Semana xlabel="Time (Mes)", ylabel="Número de casos nuevos por semana";  
 15: Plot;

16: rplot;  
 17:  
 18: CONFIDENCE 95;  
 19:  
 20: Data;

Beginning computation...  
 Stopped due to: Relative function convergence.

---- Final Results ----

NLREG version 6.5  
 Copyright (c) 1992-2010 Phillip H. Sherrod. All rights reserved.  
 This is a registered copy of NLREG that may not be redistributed.

Curva de casos nuevos de Leishmaniasis reportados semanalmente  
 Number of observations = 35  
 Maximum allowed number of iterations = 500  
 Convergence tolerance factor = 1.000000E-010  
 Stopped due to: Relative function convergence.  
 Number of iterations performed = 49  
 Final sum of squared deviations = 1.0081751E+004  
 Final sum of deviations = 6.5011182E+000  
 Standard error of estimate = 17.7498  
 Average deviation = 12.1288  
 Maximum deviation for any observation = 41.0568  
 Proportion of variance explained (R<sup>2</sup>) = 0.8756 (87.56%)  
 Adjusted coefficient of multiple determination (Ra<sup>2</sup>) = 0.8678 (86.78%)  
 Durbin-Watson test for autocorrelation = 2.100

Warning: Covariance matrix could not be computed because  
 the finite-difference Hessian was indefinite.

Analysis completed 19-May-2017 14:44. Runtime = 0.05 seconds.

Second outbreak

Title "Curva de casos nuevos de Leishmaniasis reportados semanalmente";  
 Variables Semana, TC;  
 Parameters gamma=0.00001, beta=0.001, s=6000;  
 Double rho, alpha, phi;  
 rho=gamma/beta;  
 alpha = ((s/rho-1)<sup>2</sup>+2\*s/rho<sup>2</sup>)<sup>(1/2)</sup>;  
 phi = 1/2\*ln((alpha\*rho+s-rho)/(alpha\*rho-s+rho));

Function TC =rho<sup>2</sup>/s\*(s/rho-1-alpha\*tanh(-.5\*alpha\*gamma\*Semana+phi)) - rho<sup>2</sup>/s\*(s/rho-1-alpha\*tanh(-.5\*alpha\*gamma\*(Semana-1)+phi));

Plot xvar=Semana xlabel="Time (Semana)", ylabel="Número de casos nuevos por semana";

```
Plot;
rplot;

CONFIDENCE 95;
```

```
Data;
```

```
1 20
2 36
3 37
4 42
5 64
6 100
7 50
8 94
9 118
10 142
11 124
12 111
13 142
14 101
15 91
16 91
17 31
```

Executing such code, we obtain the following results

```
1:
2: Title "Curva de casos nuevos de Leishmaniasis reportados semanalmente";
3: Variables Semana, TC;
4: Parameters gamma=0.00001, beta=0.001, s=6000;
5: Double rho, alpha, phi;
6: rho=gamma/beta;
7: alpha = ((s/rho-1)^2+2*s/rho^2)^(1/2);
8: phi =1/2*ln((alpha*rho+s-rho)/(alpha*rho-s+rho));
9:
10: Function TC =rho^2/s*(s/rho-1-alpha*tanh(-.5*alpha*gamma*Semana+phi)) - rho^2/s*(s/rho-1-
alpha*tanh(-.5*alpha*gamma*(Semana-1)+phi));
11:
12:
13:
14: Plot xvar=Semana xlabel="Time (Semana)", ylabel="Número de casos nuevos por semana";
15: Plot;
16: rplot;
17:
18: CONFIDENCE 95;
19:
20: Data;
```

Beginning computation...  
Stopped due to: Relative function convergence.

---- Final Results ----

NLREG version 6.5  
Copyright (c) 1992-2010 Phillip H. Sherrod. All rights reserved.  
This is a registered copy of NLREG that may not be redistributed.

Curva de casos nuevos de Leishmaniasis reportados semanalmente  
Number of observations = 17  
Maximum allowed number of iterations = 500  
Convergence tolerance factor = 1.000000E-010  
Stopped due to: Relative function convergence.  
Number of iterations performed = 75  
Final sum of squared deviations = 4.6614070E+003  
Final sum of deviations = 4.7134677E+000  
Standard error of estimate = 18.2471  
Average deviation = 12.3987  
Maximum deviation for any observation = 37.4434  
Proportion of variance explained ( $R^2$ ) = 0.8181 (81.81%)  
Adjusted coefficient of multiple determination ( $R_a^2$ ) = 0.7921 (79.21%)  
Durbin-Watson test for autocorrelation = 2.452

Warning: Covariance matrix could not be computed because  
the finite-difference Hessian was indefinite.

Analysis completed 19-May-2017 14:56. Runtime = 0.04 seconds.
